## RESUMPTION OF SEXUAL ACTIVITY AFTER VOLUNTARY MEDICAL MALE CIRCUMCISION: DATA FROM A POPULATION BASED COHORT IN RAKAI, UGANDA, 2013 TO 2020

Alex Daama<sup>1,2</sup>, Fred Nalugoda<sup>1</sup>, Edward Kankaka<sup>1</sup>, Asani Kasango<sup>1,2</sup>, Betty Nantume<sup>2</sup>, Grace Nalwoga Kigozi<sup>1</sup>, Robert Ssekubugu<sup>1</sup>, Juliana Namutundu<sup>2</sup>, Absalom Ssettuba<sup>1</sup>, Tom Lutalo<sup>1</sup>, Joseph Kagaayi<sup>1,2</sup>, Gertrude Nakigozi<sup>1</sup>, Stella Alamo<sup>3</sup>, Lisa A. Mills<sup>3</sup>, Geoffrey Kabuye,<sup>3</sup> Ron Gray<sup>1,4</sup>, Maria Wawer<sup>1,4</sup>, David Serwadda<sup>1,2</sup>, Nelson Sewankambo<sup>1,2</sup>, Godfrey Kigozi<sup>1</sup>

1 Rakai Health Sciences Program, Kalisizo, Uganda

2 Makerere University School of Public Health, Kampala, Uganda

3 Division of Global HIV & TB, US Centers for Disease Control and Prevention, Kampala Uganda

4 Johns Hopkins Bloomberg School of Public Health, Baltimore, MD USA

Corresponding author: Alex Daama

Kalisizo, Masaka City, Uganda.

Phone number: +256702347102/+256779755112

daamaalex6141@gmail.com

E-mail addresses of authors:

AD: [daamaalex6141@gmail.com](mailto:daamaalex6141@gmail.com)

FN: [fnalugoda@rhsp.org](mailto:fnalugoda@rhsp.org)

EK: [ekankaka@rhsp.org](mailto:ekankaka@rhsp.org)

AK: [akasango@rhsp.org](mailto:akasango@rhsp.org)

BN: [bnantume@rhsp.org](mailto:bnantume@rhsp.org)

GNK: [gracekigozi@rhsp.org](mailto:gracekigozi@rhsp.org)

RS: [rssekubugu@rhsp.org](mailto:rssekubugu@rhsp.org)

AS: [assetuba@rhsp.org](mailto:assetuba@rhsp.org)

JN: [jnamutundu@musph.ac.ug](mailto:jnamutundu@musph.ac.ug)

TL: [tlutalo@rhsp.org](mailto:tlutalo@rhsp.org)

JK: [jkagayi@rhsp.org](mailto:jkagayi@rhsp.org)

GN: [gnakigozi@rhsp.org](mailto:gnakigozi@rhsp.org)

SA: [salamo@cdc.gov](mailto:salamo@cdc.gov)

LAM: [LMills1@cdc.gov](mailto:LMills1@cdc.gov)

GK: [xlo6@cdc.gov](mailto:xlo6@cdc.gov)

RG: [rgray4@jhu.edu](mailto:rgray4@jhu.edu)

MW: [mwawer1@jhu.edu](mailto:mwawer1@jhu.edu)

DS: [dserwada@imul.com](mailto:dserwada@imul.com)

NS: [sewankam@infocom.co.ug](mailto:sewankam@infocom.co.ug)

GK: gkigozi@rhsp.org

Keywords: Trends early sex resumption post-circumcision Uganda, HIV prevention, VMMC, Uganda

Word count:

Abstract: 273/350

Main text: 1,412/3,300

## 1 **Abstract**

2 **Introduction:** Voluntary medical male circumcision (VMMC) reduces the risk of heterosexual  
3 acquisition of HIV by 50%–60%. The Uganda Ministry of Health recommends abstinence for 42  
4 days after VMMC to allow complete wound healing. However, some men resume sex early before  
5 the recommended period. We estimated trends in prevalence and risk factors of early sex  
6 resumption (ESR) among VMMC clients in Rakai, Uganda, from 2013-2020.

7 **Methods:** Data from the Rakai Community Cohort Study, a cross-sectional study were analyzed.  
8 Data included consenting men aged 15–49 years in who self-reported having received VMMC in  
9 one of four successive surveys, (June 2013 to January 2015), (February 2015 to September 2016),  
10 (October 2016 to May 2018), and (June 2018 to October 2020). ESR prevalence and associated  
11 risk factors using modified Poisson regression to estimate adjusted prevalence ratios (aPR) were  
12 estimated.

13 **Results:** Overall, 1,832 men participated in the study. ESR decreased from 45.1% in 2013 to  
14 14.9% in 2020 ( $p < 0.001$ ). Across the three surveys, ESR prevalence was consistently higher  
15 among married than never married men, aPR=1.83, 95% CI: [1.30,2.57]; aPR=2.46, 95% CI:  
16 [1.50,4.06]; aPR=2.22, 95% CI: [1.22,4.03]. ESR prevalence was higher among men who reported  
17 more than one sexual partner than men with one partner, aPR=1.59, 95% CI: [1.16,2.20]. In the  
18 fourth survey (2018-2020), ESR prevalence was significantly higher among men with primary  
19 education than men with post-primary, aPR=2.38, 95% CI: [1.31, 4.30] while ESR prevalence was  
20 lower among men aged at least 45 men with no sexual relationship in the past 12 months but self-  
21 reported to have resumed sex activities, aPR= 0, 95% CI: [1.86-07, 2.69-06] and aPR=0, 95% CI:  
22 [3.61e-07, 2.12e-06], respectively. Overall, men who reported primary school as their highest  
23 level of education reported ESR more often than those with post-primary education aPR=2.38,  
24 95% CI: [1.31, 4.30]. Occupation and known HIV status were not associated with ESR.

25 **Conclusions:** Self-reported ESR after VMMC declined between 2013 and 2020. Targeted efforts  
26 for counseling focusing on married men, men who had multiple sex partners, and men with lower  
27 levels of education can help decrease post-VMMC ESR.

28 **Word Limit: 342 words**

## 29 **Introduction**

30 Voluntary medical male circumcision (VMMC) reduces the risk of heterosexual acquisition of  
31 HIV by 50%–60% [1][2][3] and was adopted by the Uganda Ministry of Health (MOH) in 2007  
32 following recommendations from the WHO and UNICEF [4] which included guidance that men  
33 should abstain from sex for 42 days to allow complete wound healing following VMMC [5][6]

34 In Uganda, VMMC is provided free of charge with support from the President's Emergency Plan  
35 for AIDS Relief (PEPFAR) through the U.S. Centers for Disease Control and Prevention (CDC).  
36 Men undergoing VMMC receive pre- VMMC counseling and follow up 24 hours and 7 days post-  
37 VMMC to ascertain wound healing and adherence to 42 days of abstinence. [7] However, previous  
38 studies have demonstrated that circumcised men often resume sex early, predisposing them to

39 increased risk of HIV acquisition [8] and increased risk of HIV transmission to their female  
40 partners for HIV- positive men[9]. Other risks include wound disruption, bleeding, wound  
41 swelling, and pain. Cross-sectional studies indicate that between 25% to 50% of men undergoing  
42 VMMC resume sex before the recommended 42 days of abstinence[10][11][12][8]]. Research  
43 indicates that factors associated with early sex resumption (ESR) include older age, lower  
44 education and unemployment[9], being married[8] and polygamy or multiple sex partners[12].  
45 However, temporal changes in the prevalence of ESR and associated factors are unknown. We  
46 estimated prevalence of ESR and associated risk factors among men undergoing VMMC in Rakai,  
47 Uganda; over a seven-year period (2013-2020).

## 48 **Methods**

49 Study design and setting. We used cross-sectional data from the Rakai Community Cohort Study  
50 (RCCS) and the same standardized questions were asked in all four rounds of the survey. The RCCS is  
51 an open population-based cohort which enrolled about 20,000 consenting participants 15-49 years  
52 of age in 40 communities across the greater Rakai region. The survey occurs every ~18 months  
53 capturing data on socio-demographic characteristics, sexual behaviors in the past 12 months, HIV,  
54 sexually transmitted infections (STIs) including HIV prevention and treatment services, self-  
55 reported circumcision status and non-communicable diseases [14]. HIV testing was part of the  
56 VMMC program and HIV-positive men were eligible for VMMC. The communities include  
57 agrarian, peri urban/trading, and fishing communities along the shores of Lake Victoria. HIV  
58 prevalence ranges from 5.2% [15] in agrarian communities to 44.3% in fishing communities [16].  
59 Circumcised men were asked if they resumed sex and if “Yes” when they resumed sex after  
60 circumcision (Have you had sex with any one since you were circumcised? If yes, how soon after  
61 circumcision did you resume sex?). All variables were self-reported and circumcision status  
62 included only men who were medically circumcised. Men who reported being circumcised were  
63 asked when they received the service and where they received the service.

64 Participants. We included males aged 15-49 years who reported circumcision in any of four  
65 successive RCCS survey rounds (June 2013-January 2015), (February 2015- September 2016),  
66 October 2016 to May 2018), and (June 2018 to October 2020). Men were censored for all surveys  
67 and we considered men who reported recent circumcision ( $\leq 3$  years). Formal written consent was  
68 obtained from each participant prior to data collection. All consenting men who received VMMC  
69 services provided blood samples for HIV testing and were archived for future testing. We  
70 conducted a multivariate analysis for each survey round.

## 71 **Data Analysis**

72 Frequencies and proportions were used to describe participant characteristics by survey round for  
73 categorical variables, and means and medians were estimated for continuous variables. At each  
74 round, the prevalence and 95% confidence intervals (CIs) were estimated for recently circumcised  
75 men reporting early sex resumption  $< 42$  days (ESR). Risk factor analyses was conducted and the

76 dependent variable was ESR; and independent variables included age, number of sexual partners  
 77 in the past 12 months, education, occupation, marital status, and HIV status. Modified Poisson  
 78 regression was used to estimate unadjusted and adjusted prevalence ratios (aPR) of ESR at each  
 79 round. The multivariable model included variables with p-value  $\leq 5\%$  identified during bivariate  
 80 analyses. Analyses were performed using Stata version 14.0 (StataCorp, 2015). We checked for  
 81 effect modification including multi-collinearity and found that the mean of VIF of 1.32 hence  
 82 indicating no relationship between factors.

### 83 **Ethical considerations**

84 The RCCS is approved by the Uganda Virus Research Institute (UVRI) Research and Ethics  
 85 Committee (REC), the Western IRB, and the Uganda National Council Science & Technology.  
 86 All data were de-identified and participants had provided written informed consent. This project  
 87 was reviewed in accordance with CDC human research protection procedures and was determined  
 88 to be research, but CDC investigators did not interact with human subjects or have access to  
 89 identifiable data or specimens for research purpose.

## 90 **Results**

### 91 **Characteristics of participants by ESR and survey round.**

92 Table 1 presents data on participants who were previously circumcised prior to participation in the  
 93 survey. The prevalence of ESR declined from 45.1% in 2013/2015 to 21.8% in 2015/2016, and  
 94 21.8% in 2016/2018 to 14.9% in 2018/2020 [Figure 1]. Prevalence of ESR was higher among  
 95 men aged 35-44 across three survey rounds; 64.0% in 2013/15, 30.1% in 2015/16 and 25.6% in  
 96 2018/20 than other age groups (Table 1).

97 ESR prevalence was highest among currently married men across the four surveys, compared to  
 98 men who were divorced or separated (Table 1). ESR was more common among men reporting  
 99 more than one sex partner than men with one partner. ESR was higher among fisher men compared  
 100 to all other occupations across the first three survey rounds in 2013/15, 2015/16, and 2016/18.  
 101 However, in 2018/20 ESR was lower among fishermen than men who reported to be engaged in  
 102 trading.

103 ESR prevalence was also higher among those with primary education in two survey rounds, 23.4%  
 104 in 2015/16 and 22.8% in 2018/20 compared to those who completed post-primary education and  
 105 men without formal education.

106  
 107 Table 1: Early sex resumption post circumcision prevalence by survey round and socio-  
 108 demographic characteristics, 2013-2020, Rakai, Uganda

| Socio-demographic characteristics | 2013-2015                                     | 2015-2016                                     | 2016-2018                                     | 2018-2020                                     |
|-----------------------------------|-----------------------------------------------|-----------------------------------------------|-----------------------------------------------|-----------------------------------------------|
|                                   | This includes the number that resumed sex <42 | This includes the number that resumed sex <42 | This includes the number that resumed sex <42 | This includes the number that resumed sex <42 |

|                                                   | days n=203,<br>Total number<br>resumed N=450<br>n/N (%) | days n=109, Total<br>number resumed<br>N=501 n/N (%) | days n=135,<br>Total number<br>resumed N=620<br>n/N (%) | days n=39 Total<br>number resumed<br>N=261<br>n/N (%) |
|---------------------------------------------------|---------------------------------------------------------|------------------------------------------------------|---------------------------------------------------------|-------------------------------------------------------|
| Overall prevalence of ESR                         | 203/450(45.11)                                          | 109/501(21.76)                                       | 135/620(21.77)                                          | 39/261(14.94)                                         |
| Age in years                                      |                                                         |                                                      |                                                         |                                                       |
| 15-19                                             | 16/60(26.67)                                            | 9/92(9.78)                                           | 7/95(7.37)                                              | 6/71(8.45)                                            |
| 20-24                                             | 49/126(38.89)                                           | 29/156(18.59)                                        | 22/160(13.75)                                           | 11/67(16.42)                                          |
| 25-34                                             | 79/167(47.31)                                           | 42/150(28.00)                                        | 64/212(30.19)                                           | 14/73(19.18)                                          |
| 35-44                                             | 48/75(64.00)                                            | 25/83(30.12)                                         | 33/127(25.98)                                           | 11/43(25.58)                                          |
| 45+                                               | 11/22(50.00)                                            | 4/20(20.00)                                          | 5/26(19.23)                                             | 0/7(0.00)                                             |
| Marital Status                                    |                                                         |                                                      |                                                         |                                                       |
| Currently married                                 | 135/236(57.20)                                          | 76/233(32.62)                                        | 88/305(28.85)                                           | 22/94(23.40)                                          |
| Previously married                                | 23/56(41.07)                                            | 7/42(16.67)                                          | 22/77(28.57)                                            | 5/34(14.71)                                           |
| Never married                                     | 45/158(28.48)                                           | 26/226(11.50)                                        | 21/238(8.82)                                            | 15/133(11.28)                                         |
| HIV Status                                        |                                                         |                                                      |                                                         |                                                       |
| Negative                                          | 174/384(45.31)                                          | 89/437(20.37)                                        | 95/509(18.66)                                           | 38/228(16.67)                                         |
| Positive                                          | 29/66(43.94)                                            | 20/64(31.25)                                         | 36/111(32.43)                                           | 4/33(12.12)                                           |
| Number of Sexual Partners (in the past 12 months) |                                                         |                                                      |                                                         |                                                       |
| One partner in the past 12 months                 | 89/220(40.45)                                           | 51/263(19.39)                                        | 50/313(15.97)                                           | 16/117(13.68)                                         |
| More than one in the past 12 months               | 95/187(50.80)                                           | 58/226(25.66)                                        | 80/284(28.17)                                           | 26/130(20.00)                                         |
| Occupation                                        |                                                         |                                                      |                                                         |                                                       |
| Trading                                           | 28/73(38.36)                                            | 18/93(19.35)                                         | 14/82(17.07)                                            | 11/53(20.75)                                          |
| Agrarian                                          | 107/245(43.67)                                          | 59/272(21.69)                                        | 54/319(16.93)                                           | 22/155(14.19)                                         |
| Fishing                                           | 68/132(51.52)                                           | 32/136(23.53)                                        | 63/219(28.77)                                           | 9/53(16.98)                                           |
| Highest Education                                 |                                                         |                                                      |                                                         |                                                       |
| Post primary                                      | 49/129(37.98)                                           | 30/156(19.23)                                        | 27/167(16.17)                                           | 13/133(9.77)                                          |
| Primary                                           | 142/298(47.65)                                          | 78/334(23.35)                                        | 95/429(22.14)                                           | 28/123(22.76)                                         |

|                     |              |            |             |            |
|---------------------|--------------|------------|-------------|------------|
| No formal education | 12/23(52.17) | 1/11(9.09) | 9/24(37.50) | 1/5(20.00) |
|---------------------|--------------|------------|-------------|------------|

109

110 Trends in prevalence of ESR stratified by age across survey periods

111 When stratified by age, similar trends were observed among individuals aged 15-24 years, 35-44  
 112 years, and > 45 years where ESR declined over time. However, ESR increased from 4.7% (CI =  
 113 3.8-5.9) in (2013/15) to 28.0% (CI=21.1-36.0) in (2015/16) among individuals aged 25-34 years,  
 114 with a slight reduction to 23.0% in 2018/2020 (Figure 1).

115 In bivariate analysis, ESR prevalence was consistently higher among those aged 35-44 than men  
 116 aged 15-19 years across all the four study periods in 2013/15, 2015/16, 2016/18 and 2018/20  
 117 [Table 2].

118 In addition, ESR prevalence was significantly higher among currently married men than men who  
 119 never married across all surveys (Table 2).

120 ESR prevalence was significantly higher among HIV-positive men compared to HIV-negative men  
 121 in 2015/2016 and 2016/2018; PR=1.53, 95% CI: [1.02,2.31]; and PR= 1.74, 95% CI: [1.26,2.40]  
 122 respectively. However there we no significant difference in rounds 2013/2015 and 2018/2020.

123 ESR was significant in men with multiple sex partners than those reporting one sexual partner in  
 124 one survey round, 2016/2018 aPR=1.95, 95% CI: [1.48, 2.58]. However, this was not significant  
 125 in three survey rounds, 2013/15, 2015/16 and 2018/20, aPR=1.26, 95% CI: [0.94, 1.68],  
 126 aPR=1.32, 95% CI: [0.95, 1.84] and aPR=1.46, 95% CI: [0.83,2.59], respectively. In 2016/2018,  
 127 ESR was significantly higher among fisher men compared to traders; PR=1.68, 95% CI:  
 128 [1.00,2.84] and in 2016/18 ESR was higher among men with no formal education compared to  
 129 men with post-primary education; PR=2.32 95% CI: [1.25,4.32]. ESR was more prevalent among  
 130 men with primary education than men with post-primary education; PR=2.33, 95% CI:  
 131 [1.26,4.29] in 2018/2020.

132 Table 2: Unadjusted Early Sexual Resumption Prevalence Ratios post-circumcision by survey  
 133 round 2013-2020 in Rakai, Uganda

| Factor          | 2013-2015             | 2015-2016              | 2016-2018              | 2018-2020              |
|-----------------|-----------------------|------------------------|------------------------|------------------------|
|                 | Unadjusted PR[95% CI] | Unadjusted PR [95% CI] | Unadjusted PR [95% CI] | Unadjusted PR[ 95% CI] |
| Education level |                       |                        |                        |                        |
| Post-primary    | 1                     | 1                      | 1                      | 1                      |
| Primary         | 1.25[0.98, 1.61]      | 1.21[0.83,1.77]        | 1.37[0.93,2.02]        | 2.33[1.26,4.29] **     |

|                                           |                       |                     |                        |                           |
|-------------------------------------------|-----------------------|---------------------|------------------------|---------------------------|
| No formal education                       | 1.37 [0.88, 2.15]     | 0.47 [0.07,3.15]    | 2.32 [1.25,4.32] *     | 2.05[0.33, 12.77]         |
| Age group                                 |                       |                     |                        |                           |
| 15-19                                     | 1                     | 1                   | 1                      | 1                         |
| 20-24                                     | 1.46[0.91, 2.34]      | 1.90 [0.94,3.84]    | 1.87[0.83,4.20]        | 1.94[0.76,4.97]           |
| 25-34                                     | 1.77[1.13, 2.78]      | 2.86 [1.46,5.60] *  | 4.10[1.95,8.61] ***    | 2.27[0.92,5.58]           |
| 35-44                                     | 2.40[1.53, 3.78] ***  | 3.08[1.53,6.22] *   | 3.53[1.63,7.63] **     | 3.03[1.20,7.67] *         |
| 45+                                       | 1.88[1.04, 3.39] *    | 2.04[0.70,5.99]     | 2.61[0.90,7.56]        | 0[9.50e-07, 8.03e-06] *** |
| Occupation                                |                       |                     |                        |                           |
| Trading                                   | 1                     | 1                   | 1                      | 1                         |
| Agrarian                                  | 1.14 [0.82, 1.57]     | 1.12[0.70,1.80]     | 0.99[0.58,1.69]        | 0.68[0.36,1.32]           |
| Fishing                                   | 1.34 [0.96, 1.88]     | 1.22[0.73,2.03]     | 1.68[1.00,2.84] *      | 0.82[0.37,1.81]           |
| Sexual partners in the past 12 months     |                       |                     |                        |                           |
| One partner in the past 12 months         | 1                     | 1                   | 1                      | 1                         |
| More than 1 partner in the past 12 months | 1.26[0.94, 1.68]      | 1.32[0.91, 1.93]    | 1.95 [1.48, 2.589] *** | 1.58 [.97, 2.58]          |
| HIV status                                |                       |                     |                        |                           |
| Negative                                  | 1                     | 1                   | 1                      | 1                         |
| Positive                                  | 0.97[0.72,1.30]       | 1.53[1.02,2.31] *   | 1.74[1.26,2.40] **     | 0.73[0.28,1.91]           |
| Marital status                            |                       |                     |                        |                           |
| Never married                             | 1                     | 1                   | 1                      | 1                         |
| Currently married                         | 2.01 [1.53, 2.63] *** | 2.84[1.89,4.26] *** | 3.27[2.10,5.10] ***    | 2.08[1.14,3.79] *         |
| Previously married                        | 1.44[0.97, 2.15]      | 1.45[0.67,3.12]     | 3.24[1.89,5.56] ***    | 1.30[0.51,3.34]           |

134 \*\*\*p<0.001, \*\*p<0.01 & \*p<0.05

135 Multivariate analysis of risk factors associated with ESR across all study periods (2013-2020)

136 Table 3 shows the multivariate analysis, in 2018/2020 and after adjusting for marital status, age,  
 137 HIV status, occupation, and number of sexual partners in the past 12 months ESR was  
 138 significantly higher among men who reported primary education as their highest level of  
 139 completed education than men with post-primary education; aPR=2.38, 95% CI: [1.31, 4.30]. ESR  
 140 was also significantly higher among men who were currently married than men who never married,  
 141 and this was consistent across three study periods in 2013/15, 2015/16, 2016/18 and it was not



142 significant in 2018/2020. In 2016/2018, ESR was also significantly higher among unmarried men  
 143 than men who never married; aPR=1.96, 95% CI: [0.99,3.90]. In 2016/2018, ESR was higher  
 144 among men who had more than one sexual partner than those who had one sexual partner,  
 145 aPR=1.76, 95% CI: [1.32,2.34]. However, this finding was not significant across three study  
 146 survey periods.

147 ESR was significantly lower among men  $\geq 45$  years than men aged 15-19 years in 2018/2020,  
 148 aPR=0, 95% CI: [9.50e-07, 8.03e-06]. Finally, occupation and HIV status were not associated with  
 149 ESR across all study survey rounds.

150 Table 3: Adjusted Early Sexual Resumption post-circumcision by round 2013-2020 in Rakai,  
 151 Uganda

| Factor              | 2013/2015                 | 2015/2016                  | 2016/2018                  | 2018/2020                          |
|---------------------|---------------------------|----------------------------|----------------------------|------------------------------------|
|                     | Adjusted PR (aPR)[95% CI] | Adjusted PR (aPR) [95% CI] | Adjusted PR (aPR) [95% CI] | Adjusted PR (aPR) [95% CI]         |
| Education level     |                           |                            |                            |                                    |
| Post-primary        | 1                         | 1                          | 1                          | 1                                  |
| Primary             | 1.23[0.97,1.56]           | 1.17 [0.80,1.71]           | 1.12[0.75,1.68]            | 2.38[1.31, 4.30] **                |
| No formal education | 1.25[0.80,1.94]           | 0.53[0.08,3.61]            | 1.53 [0.85,2.75]           | 2.21[0.34, 14.50]                  |
| Age group           |                           |                            |                            |                                    |
| 15-19               | 1                         | 1                          | 1                          | 1                                  |
| 20-24               | 1.22 [0.74,2.00]          | 1.36[0.65,2.86]            | 1.19[0.50, 2.83]           | 1.56[0.64, 3.84]                   |
| 25-34               | 1.16 [0.70,1.94]          | 1.37[0.63,2.97]            | 1.79[0.70,4.54]            | 1.68[0.62, 4.51]                   |
| 35-44               | 1.55[0.92,2.63]           | 1.38[0.60,3.16]            | 1.39[0.53,3.64]            | 2.17[0.76, 6.15]                   |
| 45+                 | 1.16[0.59,2.25]           | 0.95[0.29,3.11]            | 0.99[0.29,3.39]            | 7.08e-07[1.86e-07<br>2.69e-06] *** |
| Occupation          |                           |                            |                            |                                    |
| Trading center      | 1                         | 1                          | 1                          | 1                                  |
| Agrarian            | 1.05 [0.77,1.44]          | 1.25[0.80,1.95]            | 1.16[0.69,1.95]            | 0.78[0.37, 1.63]                   |
| Fishing             | 1.20[0.86,1.67]           | 0.94[0.56,1.58]            | 1.30[0.77,2.18]            | 0.67[0.28, 1.62]                   |

|                                             |                    |                     |                     |                   |
|---------------------------------------------|--------------------|---------------------|---------------------|-------------------|
| Sexual partners in the past 12 months       |                    |                     |                     |                   |
| One partner in the past 12 months           | 1                  | 1                   | 1                   | 1                 |
| More than one partner in the past 12 months | 1.18 [0.88,1.59]   | 1.26[0.86, 1.85]    | 1.76[1.32,2.34] *** | 1.17 [0.70, 1.96] |
| HIV status                                  |                    |                     |                     |                   |
| Negative                                    | 1                  | 1                   | 1                   | 1                 |
| Positive                                    | 0.77[0.57,1.05]    | 1.24[0.80,1.92]     | 1.08 [0.78,1.50]    | 0.57 [0.22, 1.47] |
| Marital status                              |                    |                     |                     |                   |
| Never married                               | 1                  | 1                   | 1                   | 1                 |
| Currently married                           | 1.83[1.30,2.57] ** | 2.46[1.50,4.06] *** | 2.22[1.22,4.03] **  | 1.32[0.61, 2.84]  |
| Previously married                          | 1.29[0.82,2.01]    | 1.34[0.59,3.04]     | 1.96[0.99,3.90] *   | 0.83[0.30, 2.27]  |

152 \*\*\*p<0.001, \*\*p<0.01 & \*p<0.05

153 Overall, ESR declined over time (Table 4) from 45.1% in 2013/2015 to 21.8% in 2015/2016 ;  
 154 21.1% in 2016/2018 and 14.9% in 2018/2020.

155 In addition, recent survey visits in 2016/18 and 2018/20, ESR significantly increased, for instance  
 156 ESR prevalence was significantly higher among men aged 25-44 years than men aged 15-19 years.  
 157 ESR prevalence was significantly higher among married men and previously married men  
 158 compared to men who never married. ESR prevalence was significantly higher among men with  
 159 primary level of education than post-primary aPR=2.38, 95% CI: [1.31, 4.30] in 2018/20. ESR  
 160 prevalence was significantly higher among men with multiple sexual partners than men without  
 161 sexual partners aPR=1.36, 95% CI: [1.15, 1.61]

162 Table 4: Overall merged ESR Prevalence, Unadjusted and Adjusted Early Sexual Resumption  
 163 Prevalence Ratios post-circumcision all four surveys (2013-2020) in Rakai, Uganda

| Overall ESR Prev. | Prevalence of ESR<br>n/N % | Univariate analysis<br>PR(95% CI) pvalue | Multivariate analysis<br>PR (95% CI) pvalue |
|-------------------|----------------------------|------------------------------------------|---------------------------------------------|
| Survey Round      |                            |                                          |                                             |

|                                             |                  |                     |                     |
|---------------------------------------------|------------------|---------------------|---------------------|
| 2013/2015                                   | 203/450(45.11)   | 1.0                 | 1.0                 |
| 2015/2016                                   | 109/501(21.76)   | 0.48[0.40, 0.59]*** | 0.51[0.42, 0.62]*** |
| 2016/2018                                   | 135/620(21.77)   | 0.47[0.39, 0.56]*** | 0.47[0.39, 0.56]*** |
| 2018/2020                                   | 39/261(14.94)    | 0.36[0.27, 0.48]*** | 0.42[0.31, 0.56]*** |
| Age in years                                |                  |                     |                     |
| 15-19                                       | 38/318(11.95)    | 1.0                 |                     |
| 20-24                                       | 111/509(21.81)   | 1.82[1.30, 2.57]**  | 1.33[0.94, 1.89]    |
| 25-34                                       | 199/602(33.06)   | 2.77[2.01, 3.81]*** | 1.45[1.00, 2.10]*   |
| 35-44                                       | 117/328(35.67)   | 2.99[2.14, 4.16]*** | 1.55[1.05, 2.27]*   |
| 45+                                         | 20/75(26.67)     | 2.23[1.38, 3.60]**  | 1.07[0.64, 1.79]    |
| Marital Status                              |                  |                     |                     |
| Never Married                               | 107/755(14.17)   | 1.0                 |                     |
| Currently Married                           | 321/868(36.98)   | 2.61[2.15, 3.17]*** | 2.01[1.57, 2.57]*** |
| Previously Married                          | 57/209(27.27)    | 1.92[1.45, 2.55]*** | 1.41[1.02, 1.95]*   |
| HIV Status                                  |                  |                     |                     |
| Negative                                    | 396/1,558(25.42) | 1.0                 | 1.0                 |
| Positive                                    | 89/274(32.48)    | 1.28[1.06, 1.55]*   | 0.95[0.78, 1.15]    |
|                                             |                  |                     |                     |
| Sexual Partners in the past 12 months       |                  |                     |                     |
| One Partner in the past 12 months           | 206/913(22.56)   | 1.0                 | 1.0                 |
| More Than One Partner in the past 12 months | 259/827(31.32)   | 1.49[1.26, 1.76]*** | 1.36[1.15, 1.61]*** |
| Occupation                                  |                  |                     |                     |
| Trading Center                              | 71/301(23.59)    | 1.0                 | 1.0                 |
| Agrarian                                    | 242/991(24.42)   | 1.04[0.82, 1.30]    | 1.08[0.87, 1.34]    |
| Fishing                                     | 172/540(31.85)   | 1.35[1.06, 1.71]*   | 1.10[0.88, 1.39]    |
| Education                                   |                  |                     |                     |
| Post-Primary                                | 119/585(20.34)   | 1.0                 |                     |
| Primary                                     | 343/1,184(28.97) | 1.42[1.19, 1.71]*** | 1.29[1.08, 1.53]**  |
| No formal education                         | 23/63(36.51)     | 1.79[1.25, 2.58]**  | 1.36[0.96, 1.92]    |

164 \*\*\*p<0.001, \*\*p<0.01 & \*p<0.05

## 165 Discussion

166 We observed a twofold decline in ESR following VMMC over the 7-year period (2013-2020). A  
 167 prevalence greater than 35% reported between 2013-2015 is consistent with the prevalence  
 168 reported in Kenya between 2008 and 2010 [9] and a relative decline in prevalence noted in Uganda  
 169 between 2015-2016 and 2016-2018 is comparable with an ESR prevalence reported in Kenya [  
 170 13]. This decline over time could be due to comprehensive HIV programs which emphasized

171 delayed resumption of sex after VMMC that started in 2016 where counseling services were  
172 strengthened.[17]. Despite the decline, ESR prevalence remains higher than the recommended  
173 WHO target [5]. This puts men at risk of complications and potential HIV acquisition and  
174 transmission to female partners [6, 11].

175 We observed a relationship between marital status and ESR. Married men were consistently more  
176 likely to report ESR than unmarried men consistent with at least one other study [8]. This could  
177 be partly due to pressure from wives[18]. This result is also consistent with results from a  
178 qualitative study where men reported fear of losing their wives as a key driver to them resuming  
179 sex early [19].Therefore, we think that counseling wives about the importance of waiting would  
180 be beneficial to prevent early sex resumption.

181 Additionally, an association was observed between age and ESR following VMMC. Men aged 20-  
182 24 years and those aged 25-34 years were more likely to resume sex early compared to those aged  
183 15-19 years. This finding is consistent with previous research conducted in Kenya [8], [9]. The  
184 explanation for this association could be because these men are more likely to have multiple sex  
185 partners who could be increasing pressure on them to resume sex early. Strong post-circumcision  
186 counseling for older men is critical for controlling HIV incidence and prevalence in these  
187 populations [20].

188 Furthermore, participants who had multiple sexual partners were more likely to resume sex early  
189 compared to those who had one sexual partner. This finding is consistent with findings from [9],  
190 [12]. Health education and sensitization strategies that encourage complete wound healing and  
191 other safe sexual practices are recommended for men with multiple sexual partners to benefit from  
192 the benefits accrued from VMMC.

193 A limitation to this study is that sexual resumption questions were based on self-reports and is  
194 likely to be under-reported due to social desirability. Secondly, we could not tell if the client was  
195 HIV-positive at the time of VMMC service uptake. Further qualitative research to understand  
196 client and partner attitudes about early sexual resumption would be of value.

197 **Conclusions**

198 Generally, ESR among recently-circumcised men declined from 2013 to 2020, suggesting that  
199 counseling may have affected post-VMMC behaviors. ESR was more common among married  
200 men and men reporting multiple sex partners, suggesting that involvement of female partners could  
201 increase compliance with WHO guidelines. Men with lower education also had higher rates of  
202 ESR suggesting that targeted counseling for men with lower education could reduce ESR.

203 **Word limit: 2,605 words**

204

205 **Competing interests** [Mandatory]

206 We declare no conflict of interest

207 **Authors' contributions** [Mandatory]

208 AD contributed to conception of this research idea including supporting all stages of this research.  
209 FN, EK, AK, BN, GNK, RS, AS, JN, TL, JK, GN, SA, LAM, GK, RG, MW, DS, NS, GK supported  
210 with the study conception, design, revisions and editing.

211 **Acknowledgements** [Mandatory]

212 We thank Rakai Health Sciences Program (RHSP) for availing the data. We would like to extend  
213 our gratitude to our RCCS participants for sparing time and participate in the study.

214 **Funding:**

215 The RCCS study was funded by National Institute of Allergy and Infectious Diseases  
216 (R01AI110324, U01AI100031, R01AI110324, R01AI102939), the National Institute of Child  
217 Health and Development (RO1HD070769, R01HD050180), the Bill & Melinda Gates  
218 Foundation (22006.02), and the NIH Fogarty International Center (5D43TW009578–02). “This  
219 project has been supported by the President’s Emergency Plan for AIDS Relief (PEPFAR)  
220 through the Centers for Disease Control and Prevention under the terms of [NU2GGH002009]

221 **Disclaimer:**

222 The findings and conclusions in this report are those of the authors and do not necessarily represent  
223 the official position of the funding agencies.

224 **References**

- 225 [1] M. J. Wawer et al., “NIH Public Access,” vol. 374, no. 9685, pp. 229–237, 2010, doi:  
226 10.1016/S0140-6736(09)60998-3. Randomized.
- 227 [2] R. C. Bailey et al., “Male circumcision for HIV prevention in young men in Kisumu,  
228 Kenya: a randomised controlled trial,” *Lancet* (London, England), vol. 369, no. 9562, pp.  
229 643–656, Feb. 2007, doi: 10.1016/S0140-6736(07)60312-2.
- 230 [3] D. Taljaard, E. Lagarde, and A. Puren, “Randomized , Controlled Intervention Trial of  
231 Male Circumcision for Reduction of HIV Infection Risk : The ANRS 1265 Trial,” no.  
232 May 2014, 2005, doi: 10.1371/journal.pmed.0020298.
- 233 [4] W. H. Organization, Preventing HIV through safe voluntary medical male circumcision  
234 for adolescent boys and men in generalized HIV epidemics: recommendations and key  
235 considerations: policy brief. 2020.
- 236 [5] “Uganda SMC Technical Guidelines.pdf.” .
- 237 [6] J. H. Rogers, E. Odoyo-June, W. Jaoko, and R. C. Bailey, “Time to Complete Wound

- 238 Healing in HIV-Positive and HIV-Negative Men following Medical Male Circumcision in  
239 Kisumu, Kenya: A Prospective Cohort Study,” PLoS One, vol. 8, no. 4, pp. 3–9, 2013,  
240 doi: 10.1371/journal.pone.0061725.
- 241 [7] Health Communication Capacity Collaborative (HC3), “Voluntary medical male  
242 circumcision in-service communication best practices guide,” 2015.
- 243 [8] A. Herman-roloff and R. C. Bailey, “Factors Associated with the Early Resumption of  
244 Sexual Activity Following Medical Male Circumcision in Nyanza Province, Kenya,” vol.  
245 16;;, no. 5, pp. 1173–1181, 2013, doi: 10.1007/s10461-011-0073-1.Factors.
- 246 [9] E. Odoyo-June, J. H. Rogers, W. Jaoko, and R. C. Bailey, “Factors associated with  
247 resumption of sex before complete wound healing in circumcised HIV-positive and HIV-  
248 negative men in Kisumu, Kenya,” J. Acquir. Immune Defic. Syndr., vol. 62, no. 4, pp.  
249 465–470, Apr. 2013, doi: 10.1097/QAI.0b013e3182800710.
- 250 [10] E. U. Patel et al., “Penile Immune Activation and Risk of HIV Shedding : A Prospective  
251 Cohort Study,” vol. 64, 2017, doi: 10.1093/cid/ciw847.
- 252 [11] G. George, K. Govender, S. Beckett, C. Montague, and J. Frohlich, “Early resumption of  
253 sex following voluntary medical male circumcision amongst school-going males,” PLoS  
254 One, vol. 11, no. 12, pp. 1–12, 2016, doi: 10.1371/journal.pone.0168091.
- 255 [12] P. C. Hewett et al., “Sex with stitches: assessing the resumption of sexual activity during  
256 the postcircumcision wound-healing period,” AIDS, vol. 26, no. 6, pp. 749–756, Mar.  
257 2012, doi: 10.1097/QAD.0b013e32835097ff.
- 258 [13] A. Herman-roloff and R. C. Bailey, “NIH Public Access,” vol. 16;;, no. 5, pp. 1173–1181,  
259 2013, doi: 10.1007/s10461-011-0073-1.Factors.
- 260 [14] M. J. Wawer et al., “Control of sexually transmitted diseases for AIDS prevention in  
261 Uganda: a randomised community trial. Rakai Project Study Group,” Lancet (London,  
262 England), vol. 353, no. 9152, pp. 525–535, Feb. 1999, doi: 10.1016/s0140-  
263 6736(98)06439-3.
- 264 [15] S. L. Sevidzem, A. Mamoudou, N. B. Kenne, D. M. Lontsi, and I. Akoge, “HIV/AIDS  
265 infection prevalence in an agriculture-dominated rural community of west region of  
266 Cameroon,” Asian Pacific J. Trop. Dis., vol. 6, no. 10, pp. 765–769, 2016, doi:  
267 10.1016/S2222-1808(16)61126-X.
- 268 [16] R. Mafigiri et al., “HIV prevalence and uptake of HIV/AIDS services among youths (15-  
269 24 Years) in fishing and neighboring communities of Kasensero, Rakai District, South  
270 Western Uganda,” BMC Public Health, vol. 17, no. 1, pp. 1–10, 2017, doi:  
271 10.1186/s12889-017-4166-2.
- 272 [17] A. Anglemyer, N. Haber, A. Noiman, and G. Rutherford, “HIV Care Continuum and  
273 Meeting 90-90-90 Targets : Cascade of Care Analyses of a U . S . Military Cohort,” vol.  
274 185, no. August, pp. 1147–1154, 2020, doi: 10.1093/milmed/usaa021.
- 275 [18] K. Mati, K. K. Adegoke, and H. M. Salihu, “Factors associated with married women ’ s

276 support of male circumcision for HIV prevention in Uganda : a population based cross –  
277 sectional study,” BMC Public Health, pp. 1–8, 2016, doi: 10.1186/s12889-016-3385-2.

278



**Figure 1 shows early sex resumption following circumcision among men of different age groups over time (2013-2020) in Rakai, Uganda**

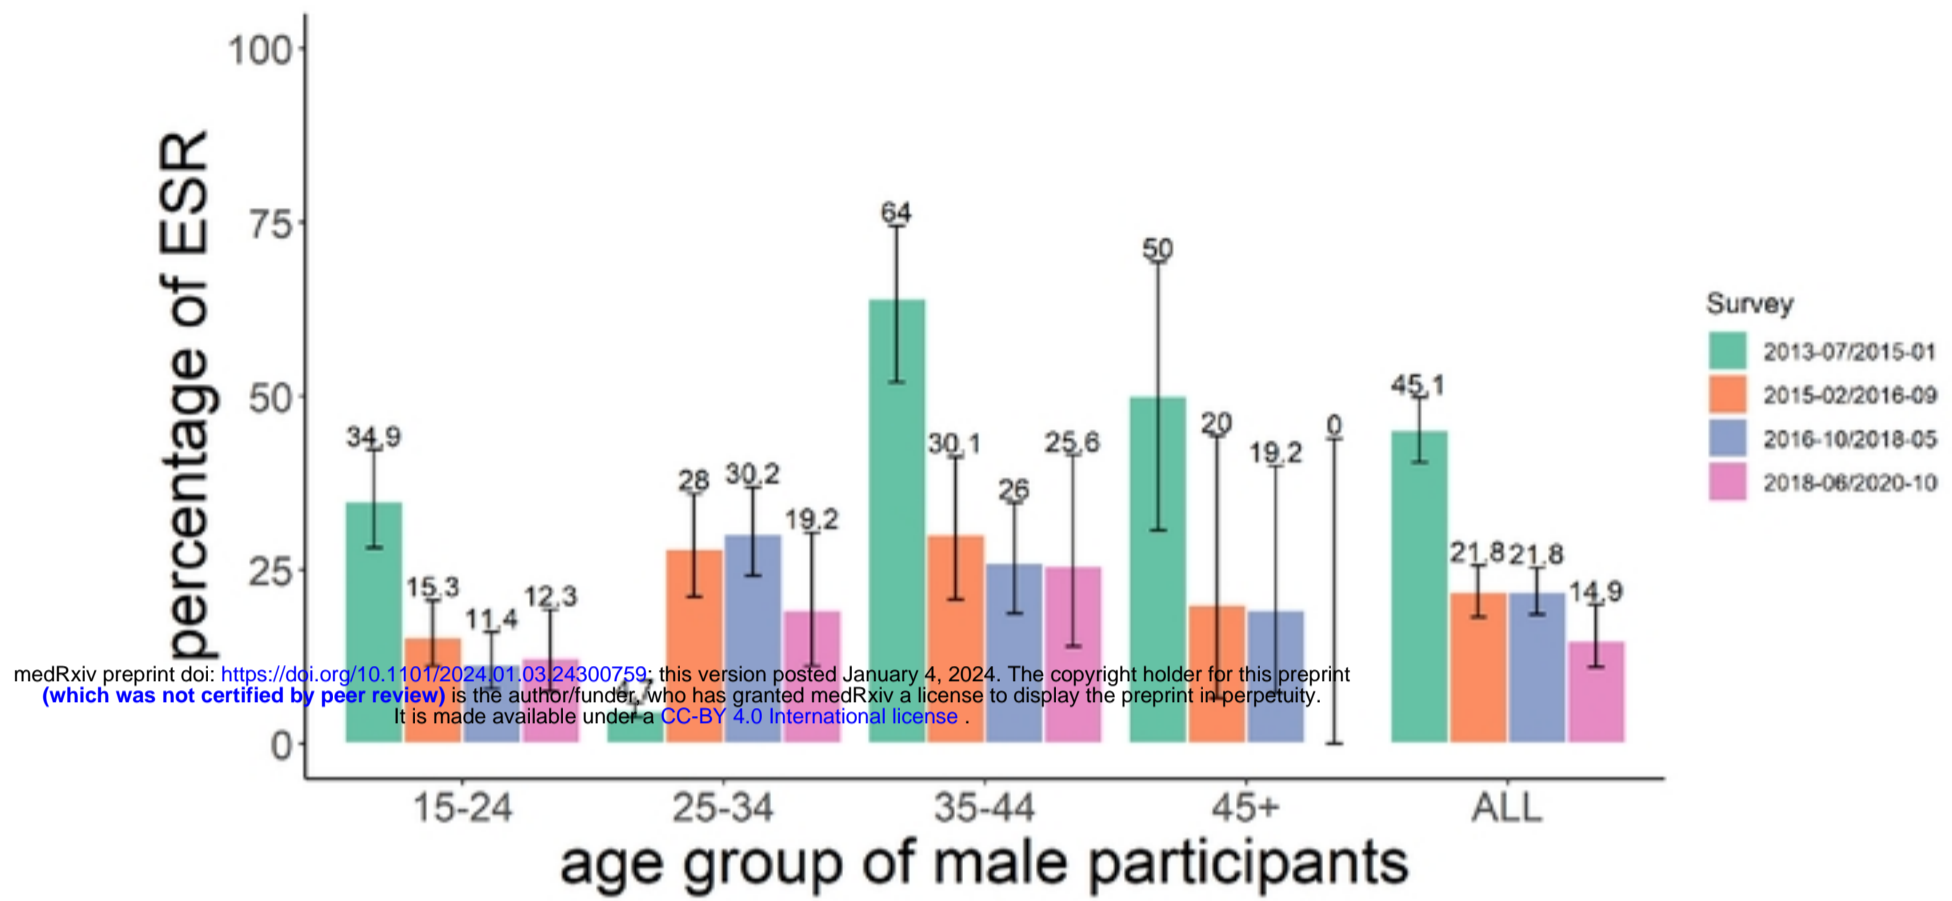

Source: https://medrxiv.org/content/10.1101/2024.01.03.24300759.full.pdf
